# Supplementary material for: A novel computational method enables RNA editome profiling during human hematopoiesis from scRNA-seq data
Source: PubMed Central journal article supplement (PMC10293275; doi:10.1038/s41598-023-37325-4), 2023-06-26
Supplement: 41598_2023_37325_MOESM2_ESM.pdf [file 41598_2023_37325_MOESM2_ESM.pdf]

**Figure S2. The genomic elements distribution of RNA editing.**

**(A)** Box plot showing the distance from each edited site to the nearest neighbor. **(B)** Pie charts show the proportion of editing sites within and outside ALUs in each HSPC population. **(C)** Pie charts show the distribution of editing sites across different genomic elements in each HSPC population.
