# Supplementary material for: A novel computational method enables RNA editome profiling during human hematopoiesis from scRNA-seq data
Source: PubMed Central journal article supplement (PMC10293275; doi:10.1038/s41598-023-37325-4), 2023-06-26

**Figure S2****A**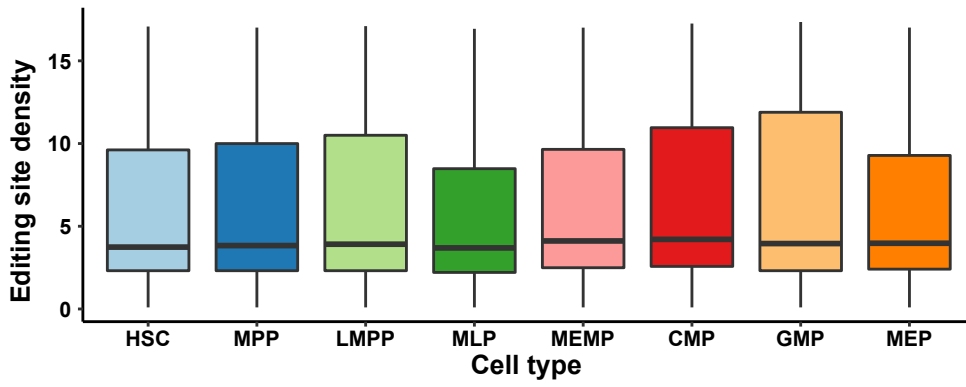**B**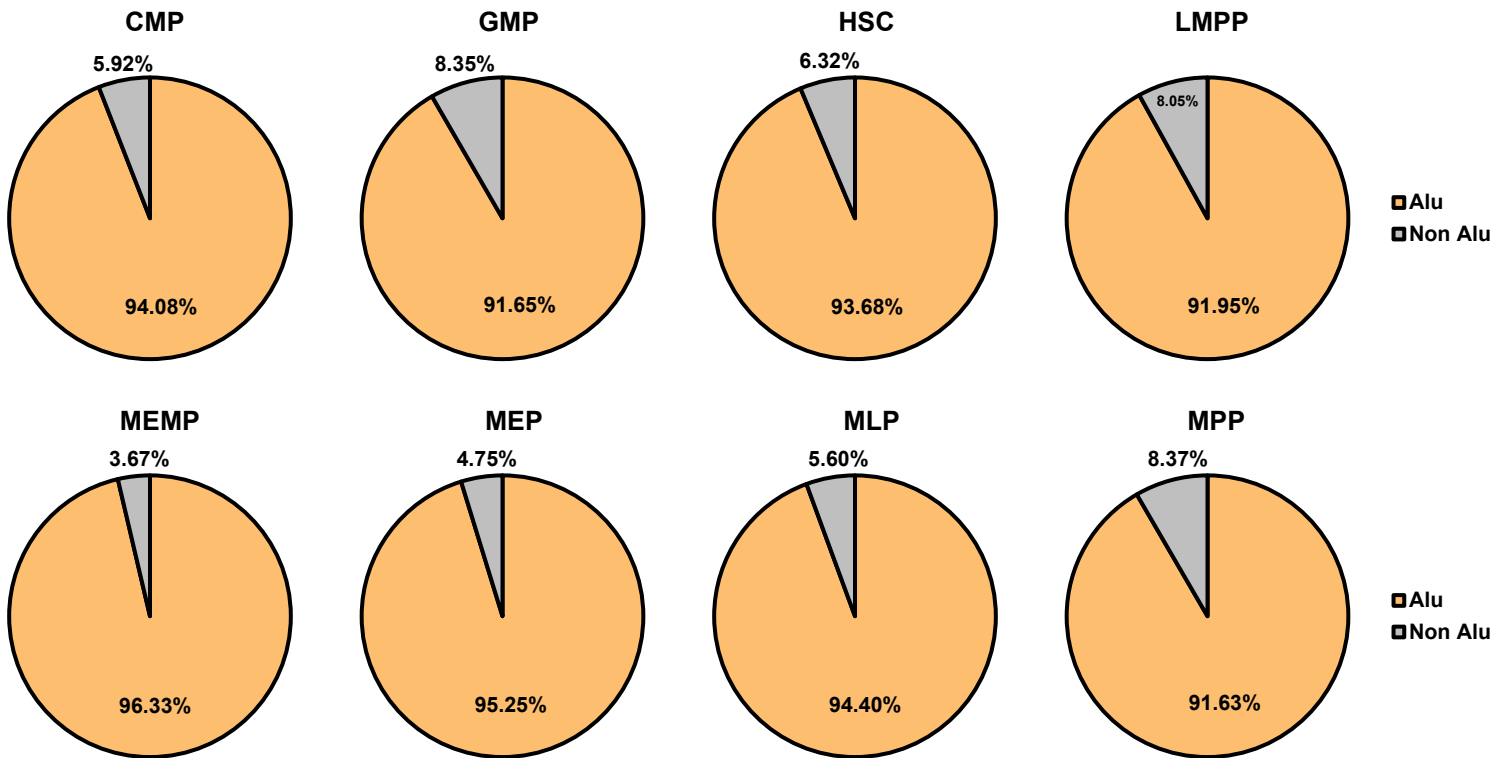**C**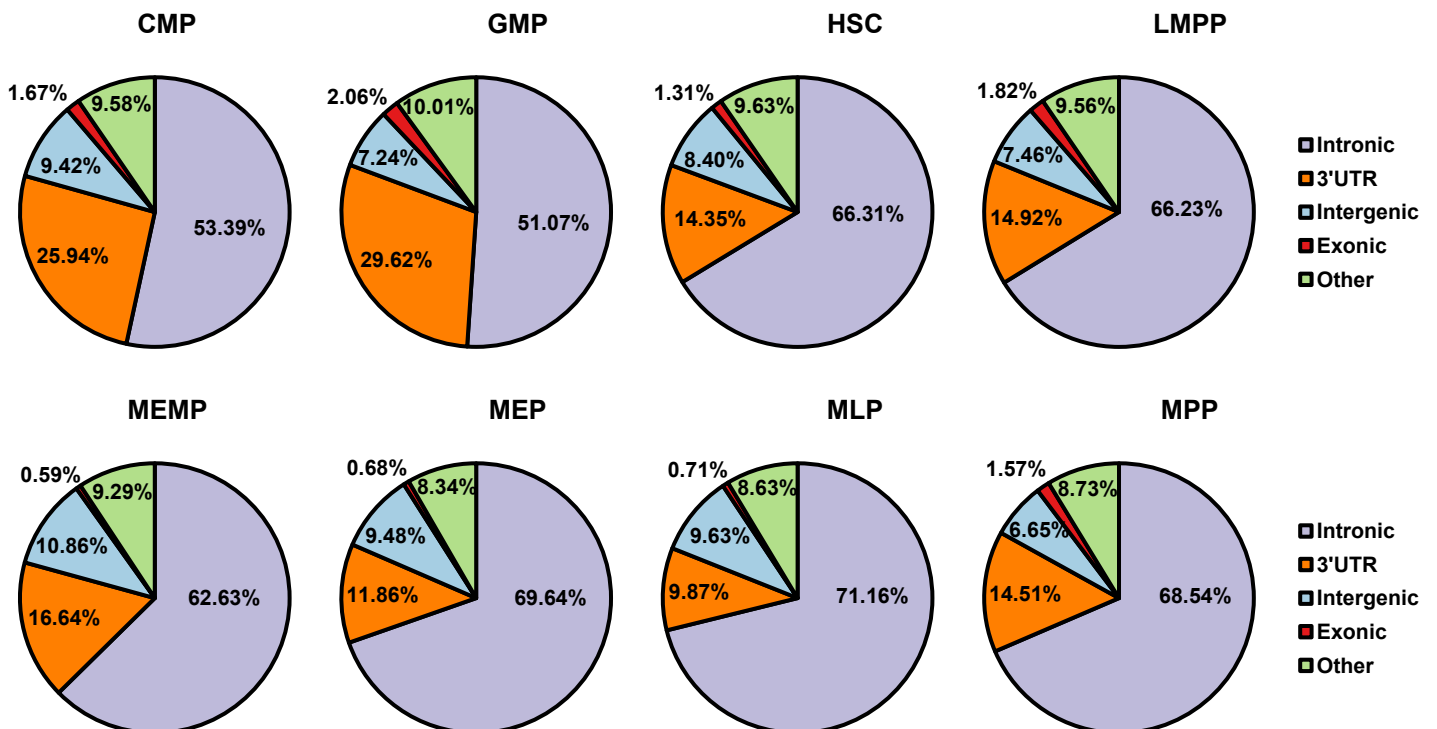

Supplement: 41598_2023_37325_MOESM3_ESM.pdf [file 41598_2023_37325_MOESM3_ESM.pdf]
