# Supplementary material for: A novel computational method enables RNA editome profiling during human hematopoiesis from scRNA-seq data
Source: PubMed Central journal article supplement (PMC10293275; doi:10.1038/s41598-023-37325-4), 2023-06-26
Supplement: 41598_2023_37325_MOESM4_ESM.pdf [file 41598_2023_37325_MOESM4_ESM.pdf]

**Figure S3****A**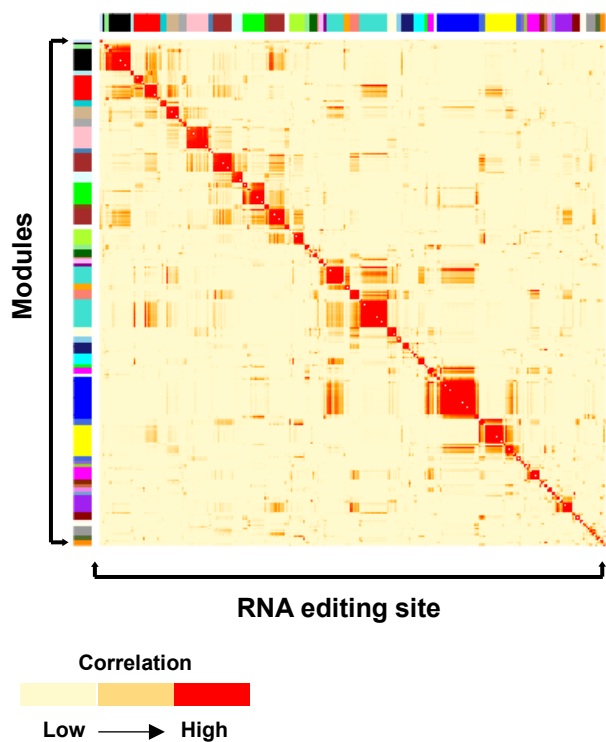**B**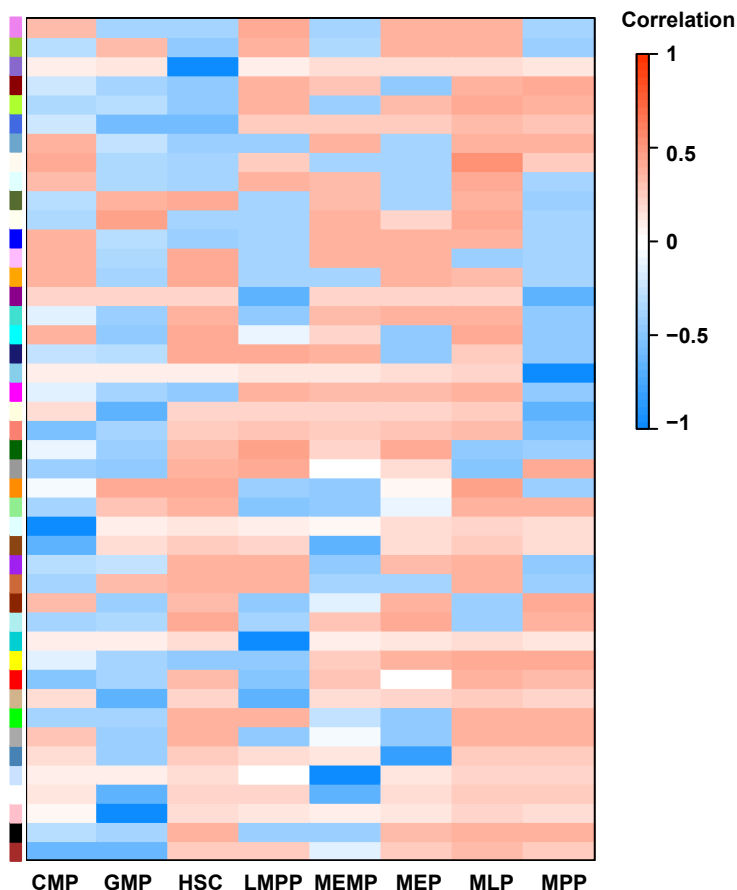**C**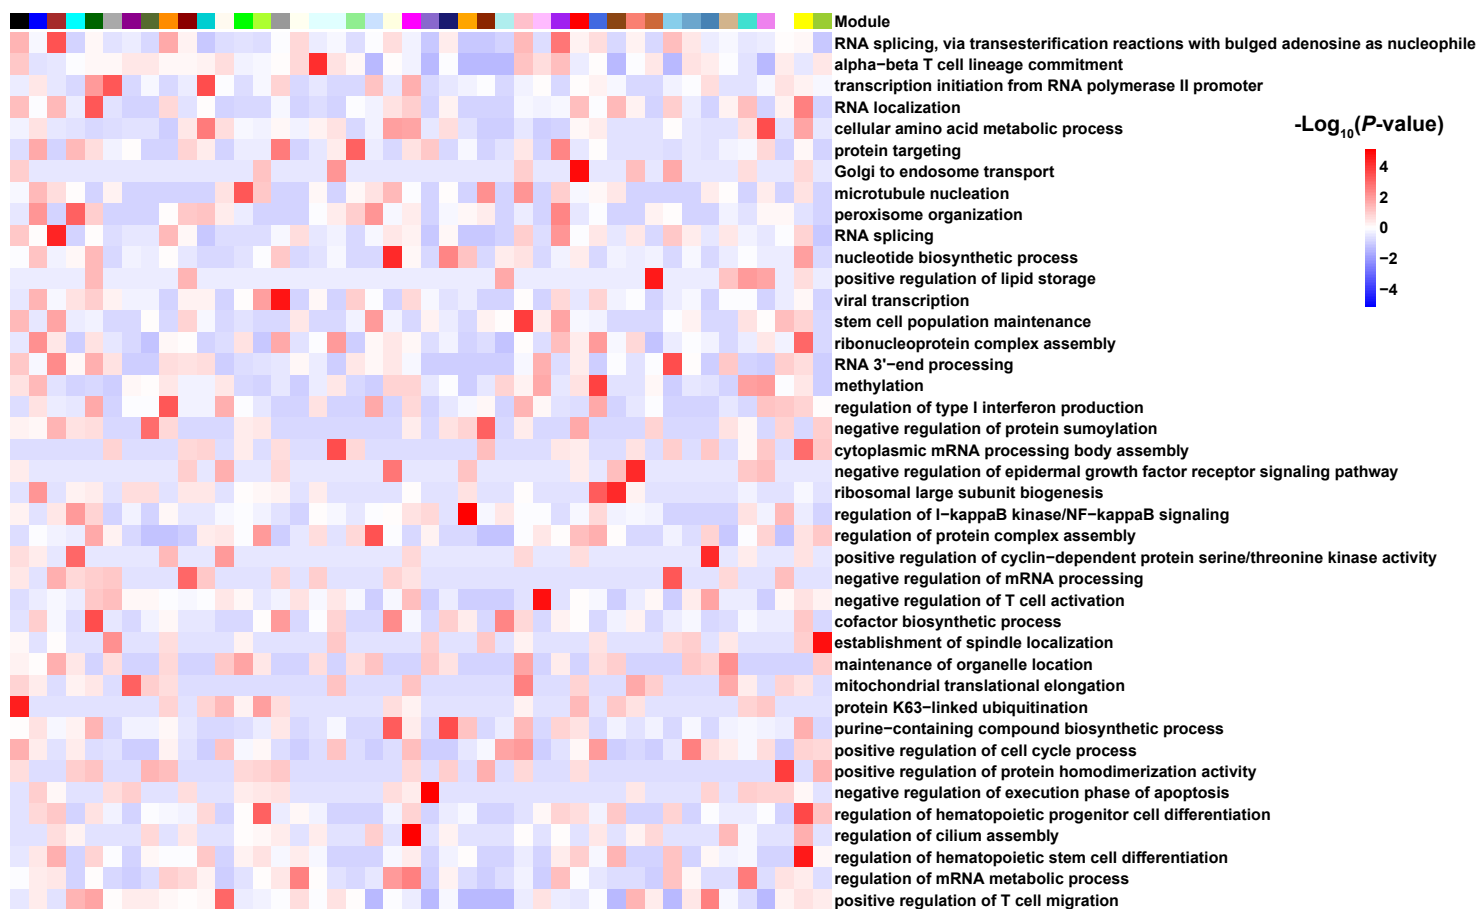**Figure S3. Co-editing modules of RNA editing and functions.**

(A) A heatmap showing 44 co-editing modules across 8 HSPC populations. The color (from yellow to red) represents the correlation (from low to high). (B) A heatmap showing the correlation between cell types and modules. (C) A heatmap showing the most significant enriched GO pathways in each module.
