# Supplementary material for: A novel computational method enables RNA editome profiling during human hematopoiesis from scRNA-seq data
Source: PubMed Central journal article supplement (PMC10293275; doi:10.1038/s41598-023-37325-4), 2023-06-26
Supplement: 41598_2023_37325_MOESM5_ESM.pdf [file 41598_2023_37325_MOESM5_ESM.pdf]

# Figure S4

## A

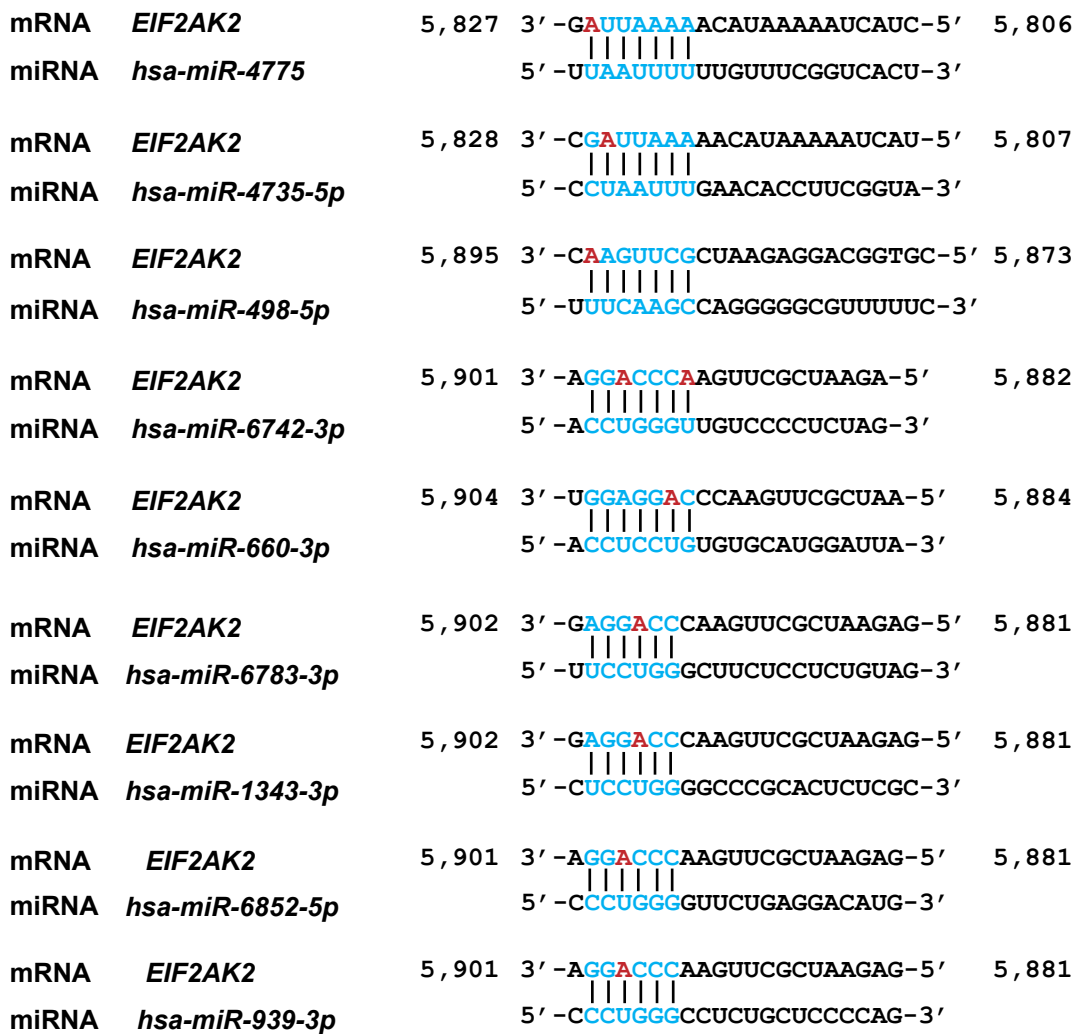

## B

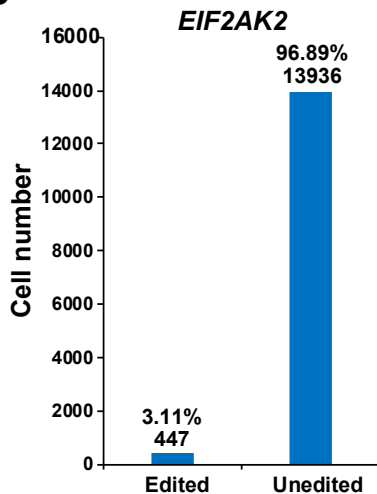

## C

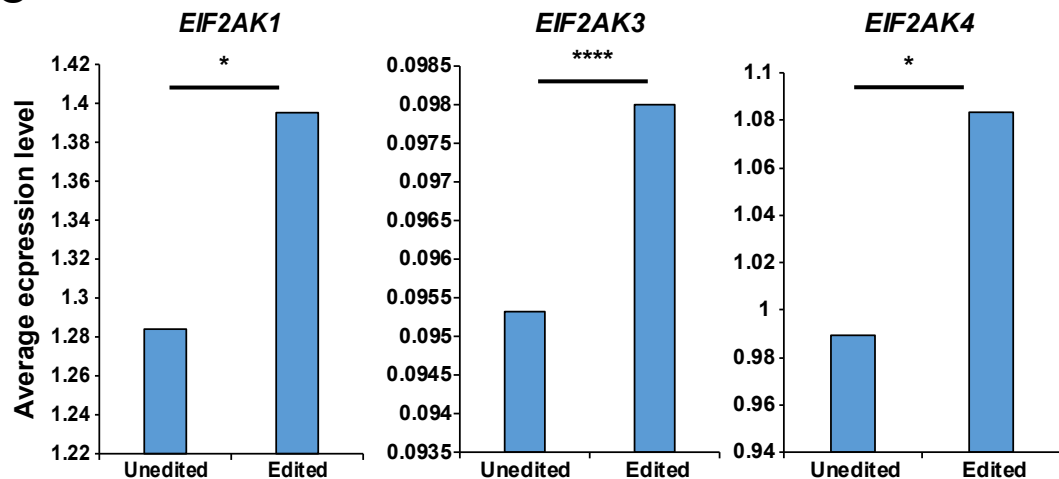

**Figure S4. The RNA editing sites located in *EIF2AK2* influence miRNA-target binding.**

(A) Predicted site in the *EIF2AK2* 3'UTR mRNA (red: nucleotides edited). (B) Bar plot showing the proportion of cells without and with *EIF2AK2* editing sites. Only the cells expressing *EIF2AK2* were calculated. (C) Bar plots showing the average expression level of *EIF2AK1*, *EIF2AK3*, *EIF2AK4* in cells without and with *EIF2AK2* editing sites. *P*-value was calculated by Wilcoxon Rank Sum test.

\*\*\*\**P* < 0.0001, \**P* < 0.05
