# Supplementary material for: A novel computational method enables RNA editome profiling during human hematopoiesis from scRNA-seq data
Source: PubMed Central journal article supplement (PMC10293275; doi:10.1038/s41598-023-37325-4), 2023-06-26
Supplement: 41598_2023_37325_MOESM6_ESM.pdf [file 41598_2023_37325_MOESM6_ESM.pdf]

# Figure S5

**A**

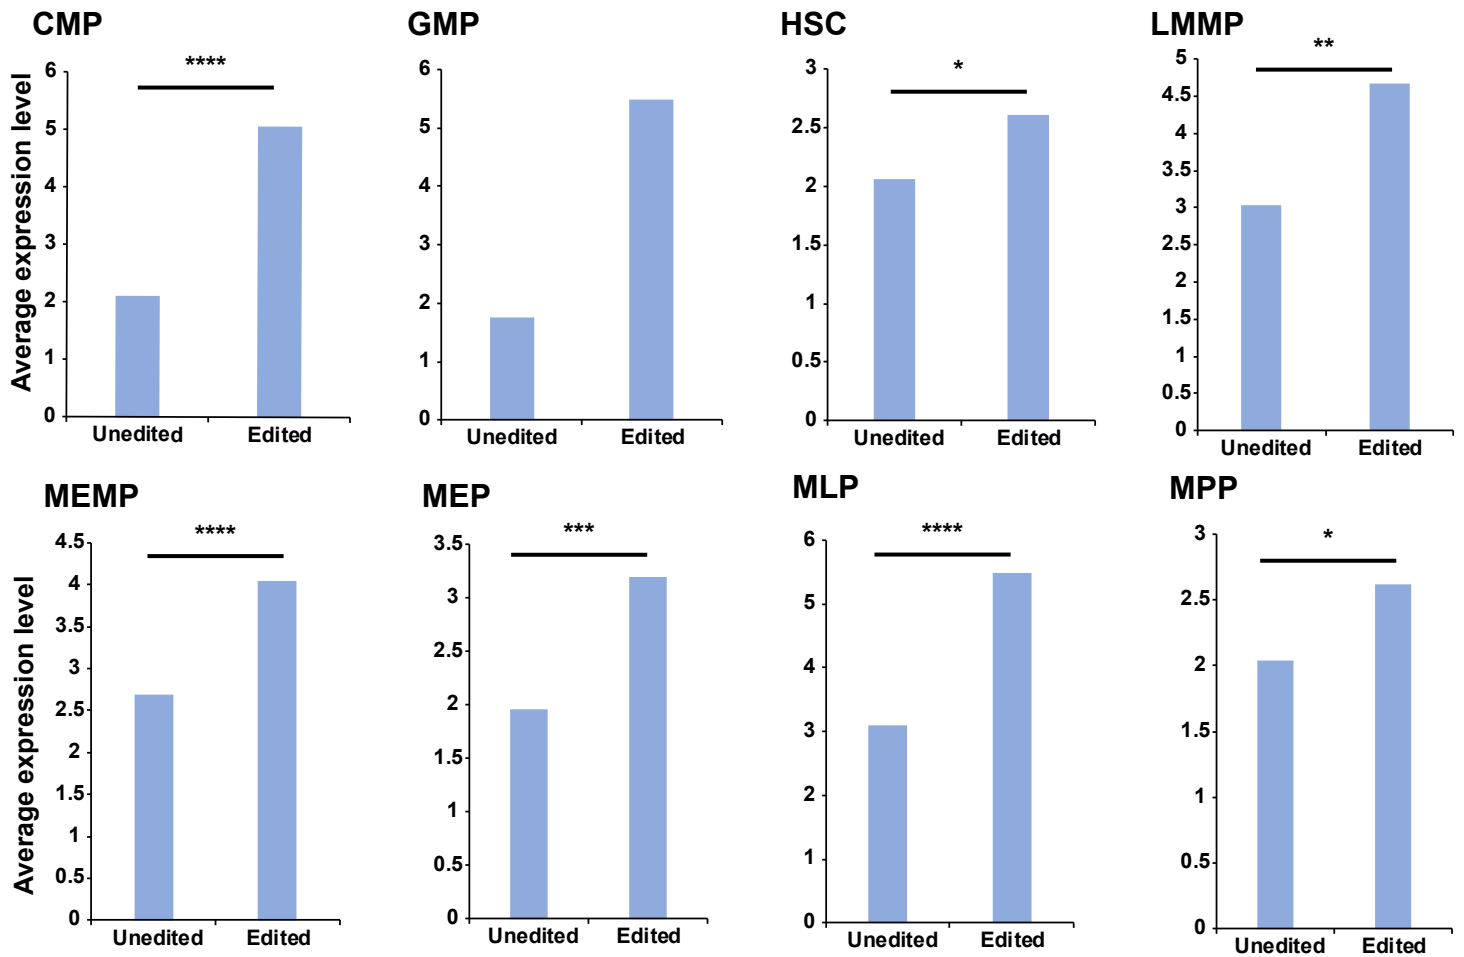

**B**

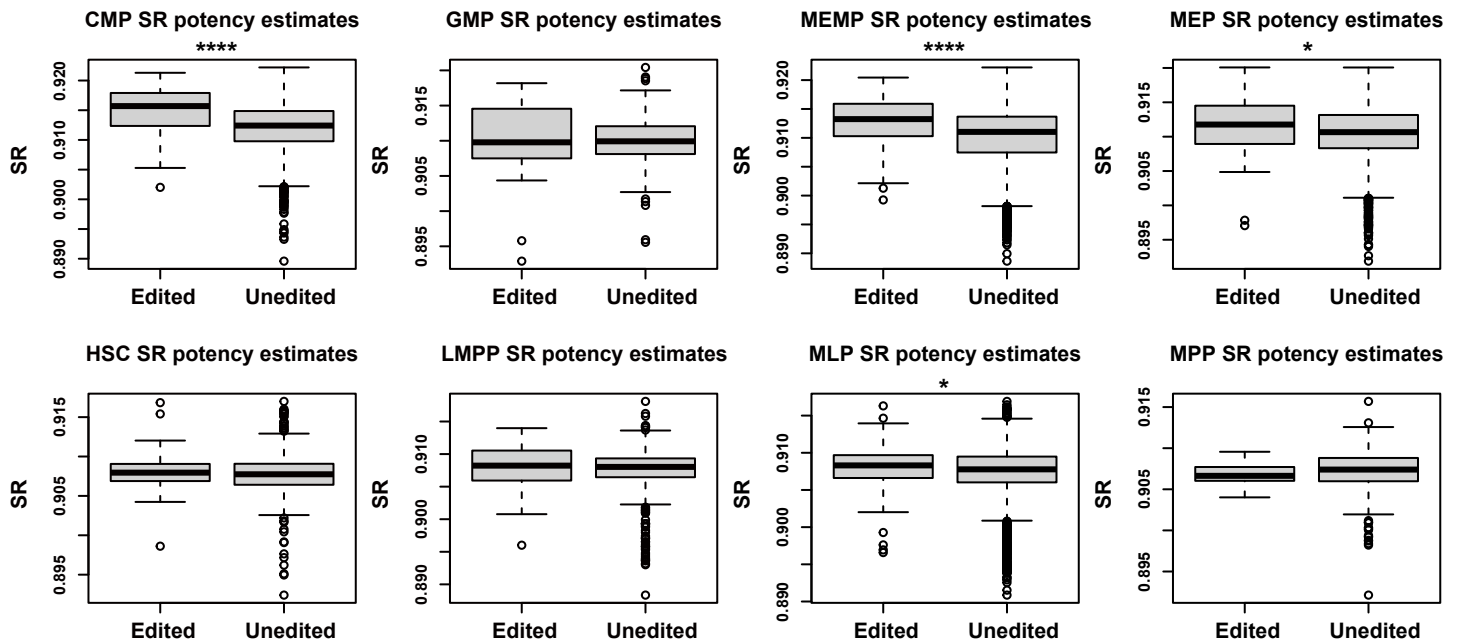

**Figure S5. The 8 HSPC populations with editing sites may show high differentiation potential and promote the expression level of *EIF2AK2*.**

**(A)** The bar plots show the average expression of *EIF2AK2* in 8 HSPCs of edited and unedited cell groups. \*\*\*\* $P < 0.0001$ , \* $P < 0.05$ . **(B)** The boxplot shows the level of differentiation potential in 8 cell types of edited versus unedited cell populations. \*\*\*\* $P < 0.0001$ , \* $P < 0.05$ . P-value was calculated by T-Test. No \* means the difference is not significant.
